# Supplementary material for: Agonist anti-GITR monoclonal antibody and stereotactic radiation induce immune-mediated survival advantage in murine intracranial glioma
Source: PubMed Central journal article supplement (PMC4869343; doi:10.1186/s40425-016-0132-2), 2016-05-17
Supplement: 40425_2016_132_MOESM1_ESM.pdf [file 40425_2016_132_MOESM1_ESM.pdf]

CD45

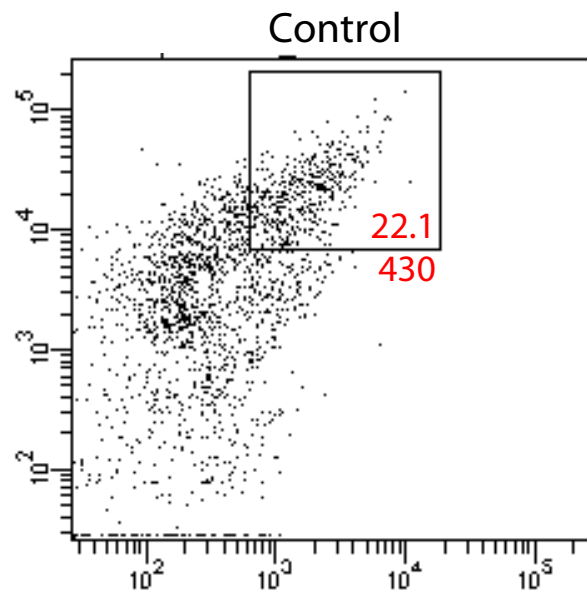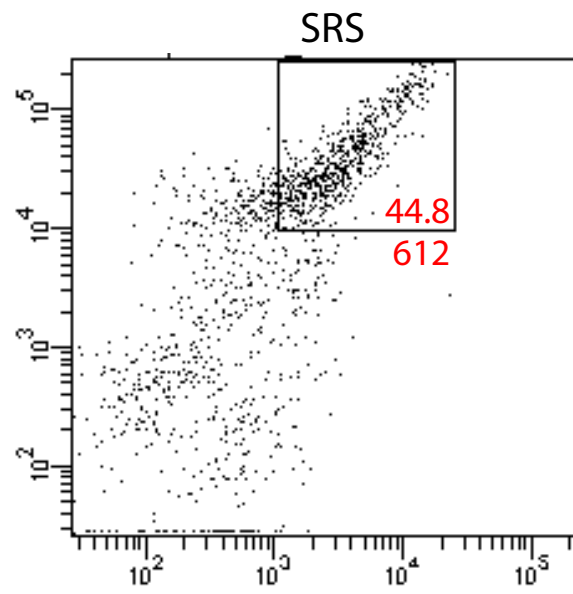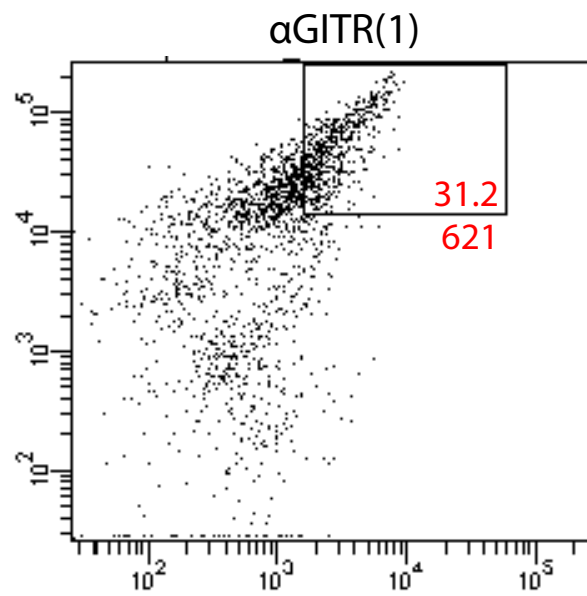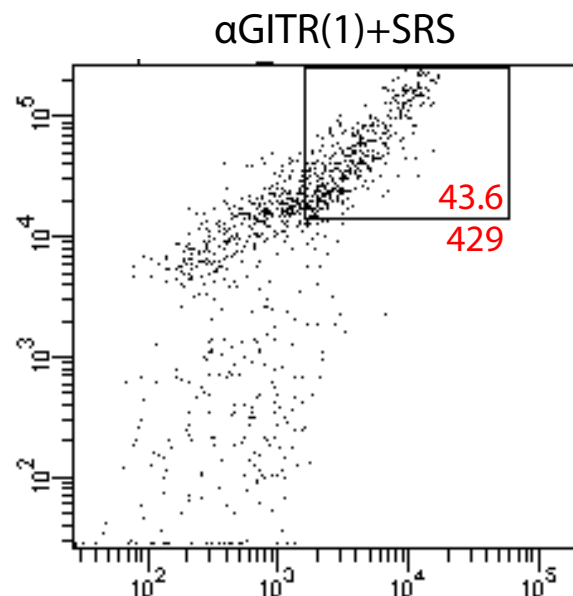

CD11b
